# Supplementary material for: Past and future climate change effects on thermal regime and oxygen solubility of four peri-alpine lakes
Source: Copernicus journal article supplement (doi:10.5194/egusphere-2022-260), 2022-06-03
Supplement: Supplementary file 1 [file egusphere-2022-260-supplement.pdf]

# Past and future climate change effects on thermal regime and oxygen solubility of four peri-alpines lakes

5 **Table S1: Sensitivity tests on climate variables** from MyLake water temperature simulations over a 10-year period, for the 4 perialpine lakes (Geneva, Annecy, Bourget and Aiguebelette). Performance metrics calculation (RMSE and R2) with  $\pm 20\%$  to each climate variable independently ( $\Delta = \left| \frac{\text{RMSE}/R^2_{\text{raw data}} - \text{RMSE}/R^2_{\pm 20\%}}{\text{RMSE}/R^2_{\text{raw data}}} \right|$ )

| Lake         | Variable            | RMSE     |       |             |       |             | R2       |       |              |       |              |
|--------------|---------------------|----------|-------|-------------|-------|-------------|----------|-------|--------------|-------|--------------|
|              |                     | raw data | +20 % | $\Delta$    | -20 % | $\Delta$    | raw data | +20 % | $\Delta$     | -20 % | $\Delta$     |
| Geneva       | Air temperature     |          | 1,68  | <b>0,28</b> | 1,37  | 0,03        |          | 0,912 | 0,000        | 0,908 | 0,004        |
|              | Shortwave radiation |          | 2,00  | <b>0,60</b> | 1,29  | 0,11        |          | 0,895 | <b>0,016</b> | 0,919 | <b>0,008</b> |
|              | Wind speed          |          | 1,34  | 0,06        | 1,46  | 0,06        |          | 0,913 | 0,002        | 0,909 | 0,002        |
|              | Cloud cover         | 1,40     | 1,65  | 0,25        | 1,22  | <b>0,18</b> | 0,911    | 0,900 | <b>0,011</b> | 0,918 | <b>0,007</b> |
|              | Relative Humidity   |          | 1,61  | 0,21        | 1,27  | <b>0,13</b> |          | 0,907 | 0,004        | 0,914 | 0,002        |
|              | Rain                |          | 1,40  | 0,00        | 1,40  | 0,00        |          | 0,911 | 0,000        | 0,911 | 0,000        |
|              | Pressure            |          | 1,32  | 0,08        | 1,49  | 0,09        |          | 0,914 | 0,003        | 0,908 | 0,004        |
| Annecy       | Air temperature     |          | 1,68  | 0,29        | 2,52  | <b>0,55</b> |          | 0,880 | <b>0,013</b> | 0,900 | <b>0,007</b> |
|              | Shortwave radiation |          | 1,60  | <b>0,37</b> | 2,65  | <b>0,67</b> |          | 0,898 | <b>0,005</b> | 0,881 | <b>0,011</b> |
|              | Wind speed          |          | 2,10  | 0,13        | 1,87  | 0,11        |          | 0,894 | 0,001        | 0,890 | 0,002        |
|              | Cloud cover         | 1,97     | 1,83  | 0,15        | 2,24  | 0,27        | 0,893    | 0,891 | 0,002        | 0,891 | 0,001        |
|              | Relative Humidity   |          | 1,75  | 0,22        | 1,97  | 0,00        |          | 0,889 | 0,003        | 0,893 | 0,000        |
|              | Rain                |          | 2,32  | <b>0,35</b> | 1,97  | 0,00        |          | 0,894 | 0,001        | 0,893 | 0,000        |
|              | Pressure            |          | 2,05  | 0,08        | 1,90  | 0,07        |          | 0,892 | 0,001        | 0,892 | 0,000        |
| Bourget      | Air temperature     |          | 2,82  | <b>0,58</b> | 1,79  | 0,45        |          | 0,901 | 0,001        | 0,893 | 0,006        |
|              | Shortwave radiation |          | 3,06  | <b>0,83</b> | 1,54  | <b>0,69</b> |          | 0,878 | <b>0,021</b> | 0,915 | <b>0,016</b> |
|              | Wind speed          |          | 1,91  | 0,32        | 2,59  | 0,36        |          | 0,908 | 0,009        | 0,888 | <b>0,012</b> |
|              | Cloud cover         | 2,23     | 2,64  | 0,41        | 1,83  | 0,40        | 0,900    | 0,885 | <b>0,015</b> | 0,911 | <b>0,012</b> |
|              | Relative Humidity   |          | 2,73  | 0,50        | 1,77  | <b>0,46</b> |          | 0,890 | 0,010        | 0,907 | 0,007        |
|              | Rain                |          | 2,23  | 0,00        | 2,23  | 0,00        |          | 0,900 | 0,000        | 0,900 | 0,000        |
|              | Pressure            |          | 2,02  | 0,22        | 2,47  | 0,23        |          | 0,906 | 0,007        | 0,891 | 0,009        |
| Aiguebelette | Air temperature     |          | 3,82  | <b>0,62</b> | 2,71  | <b>0,49</b> |          | 0,896 | <b>0,004</b> | 0,884 | <b>0,008</b> |
|              | Shortwave radiation |          | 3,99  | <b>0,79</b> | 2,49  | <b>0,71</b> |          | 0,892 | 0,001        | 0,888 | <b>0,005</b> |
|              | Wind speed          |          | 2,98  | 0,22        | 3,44  | 0,24        |          | 0,894 | 0,001        | 0,891 | 0,002        |
|              | Cloud cover         | 3,20     | 3,67  | 0,47        | 2,75  | 0,45        | 0,893    | 0,885 | <b>0,008</b> | 0,898 | <b>0,005</b> |
|              | Relative Humidity   |          | 3,70  | 0,50        | 2,73  | 0,47        |          | 0,890 | 0,003        | 0,894 | 0,001        |
|              | Rain                |          | 3,20  | 0,00        | 3,20  | 0,00        |          | 0,893 | 0,000        | 0,893 | 0,000        |
|              | Pressure            |          | 3,00  | 0,20        | 3,43  | 0,23        |          | 0,895 | 0,002        | 0,890 | 0,003        |

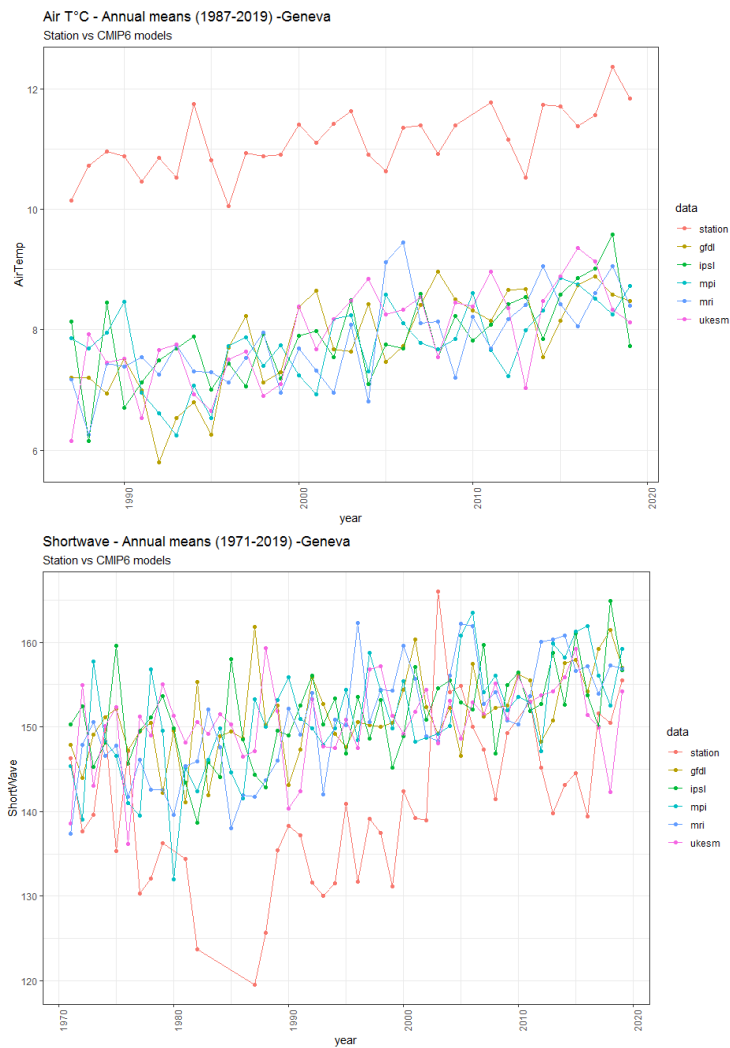

**Figure S1: Evolution of air temperature (A) and shortwave radiation (B) of the five climatic models extracted from ISIMIP3b (CMIP6): GFDL-ESM4, MPI-ESM1-2-HR, MRI-ESM2-0, IPSL-CM6A-LR and UKESM1-0-LL. Comparison to the closest meteorological station to Lake Geneva: Thonon-les-Bains station. Correction of the climatic models data relative to the altitude was applied (c.f. Method section).**

25 **Table S2: Performance metrics (Root mean square error, Normalized mean absolute error, Pearson correlation coefficient)** to select the most performant climate model for air temperature and shortwave radiation predictions.

|                     | Air Temperature |       |       | Shortwave |       |       |
|---------------------|-----------------|-------|-------|-----------|-------|-------|
|                     | RMSE            | NMAE  | r     | RMSE      | NMAE  | r     |
| GFDL-ESM4           | 4,40            | 2,01  | 0,805 | 77,74     | 0,759 | 0,687 |
| <b>IPSL-CM6A-LR</b> | 4,27            | 1,57  | 0,814 | 76,84     | 2,374 | 0,692 |
| MPI-ESM1-2-HR       | 4,39            | 1,90  | 0,804 | 77,20     | 0,761 | 0,691 |
| MRI-ESM2-0          | 4,34            | 10,28 | 0,809 | 78,03     | 2,453 | 0,686 |
| UKESM1-0-LL         | 4,21            | 4,54  | 0,811 | 77,62     | 2,145 | 0,686 |

30

35 **Table S3. Climate forcing data**

| Model title   | Institution                                                                                                      | Ensemble member |
|---------------|------------------------------------------------------------------------------------------------------------------|-----------------|
| GFDL-ESM4     | National Oceanic and Atmospheric Administration, Geophysical Fluid Dynamics Laboratory, Princeton, NJ 08540, USA | r1i1p1f1        |
| IPSL-CM6-LR   | Institut Pierre Simon Laplace, Paris 75252, France                                                               | r1i1p1f1        |
| UKESM1-0-LL   | Met Office Hadley Centre, Fitzroy Road, Exeter, Devon, EX1 3PB, UK                                               | r1i1p1f2        |
| MPI-ESM1-2-HR | Max Planck Institute for Meteorology, Hamburg 20146, Germany                                                     | r1i1p1f1        |
| MRI-ESM2-0    | Meteorological Research Institute, Tsukuba, Ibaraki 305-0052, Japan                                              | r1i1p1f1        |

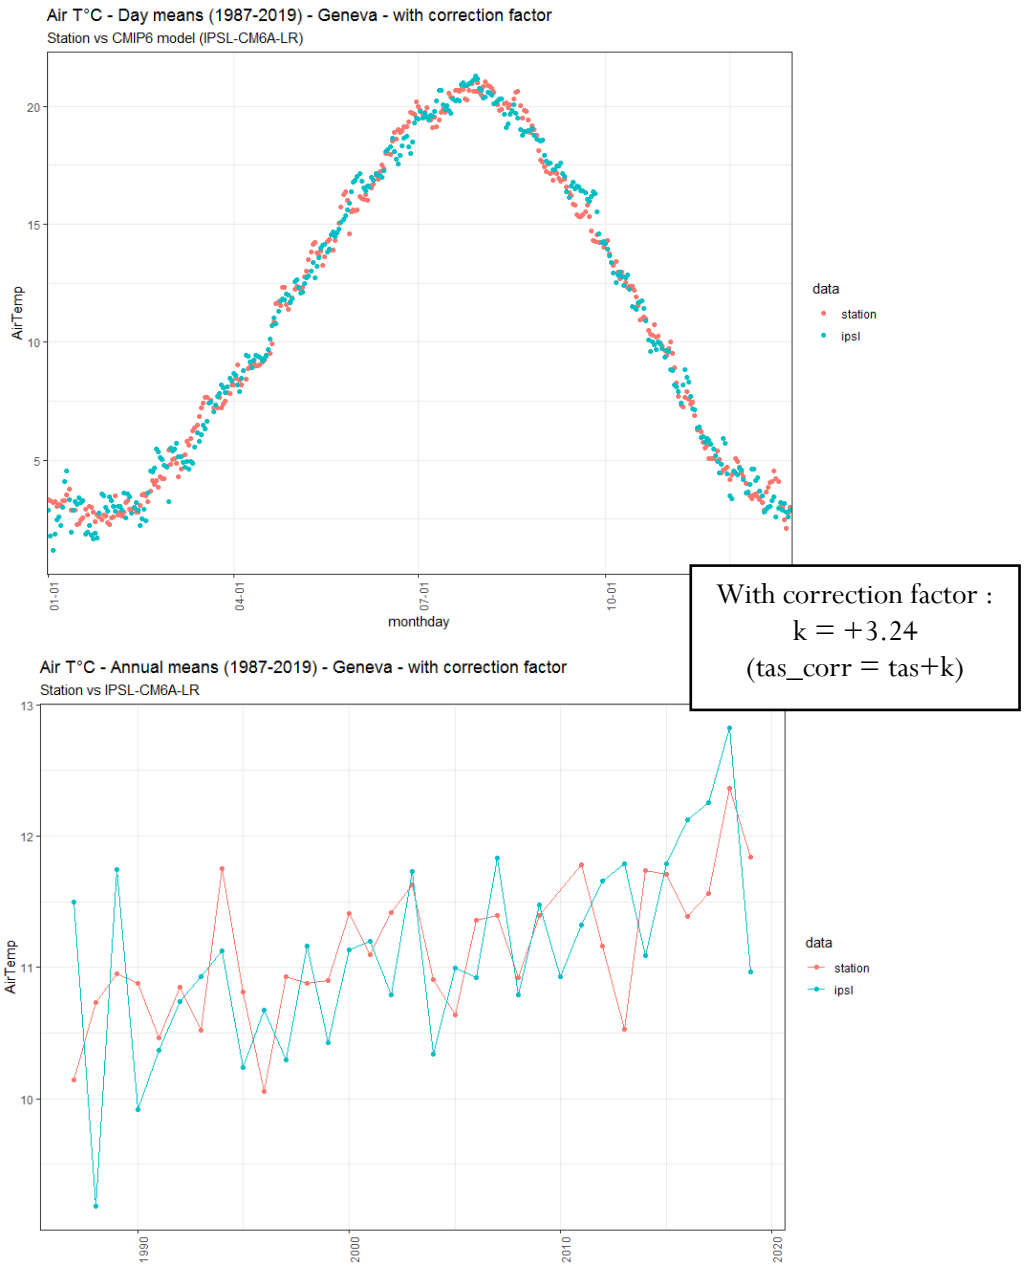

40 **Figure S2: Comparison of annual and daily mean air temperature** from meteorological station (red) and IPSL-CM6A-LR model (blue) with correction factor.

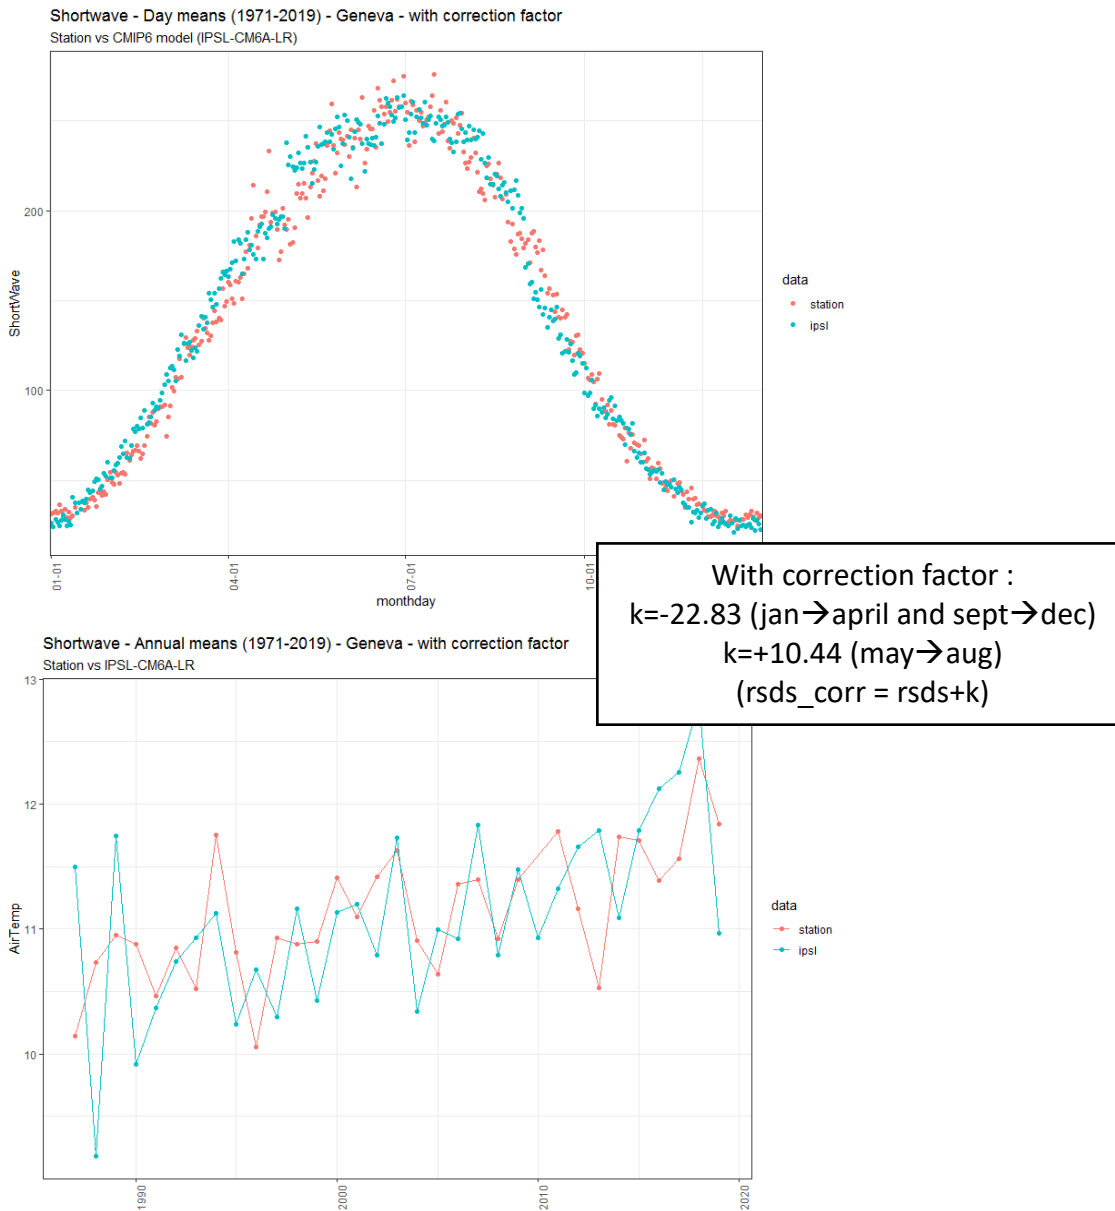

**Figure S3: Comparison of annual and daily mean shortwave radiation** from meteorological station (red) and IPSL-CM6A-LR model (blue) with correction factor. Correction of the climatic models data relative to the altitude was applied (c.f. Method section).

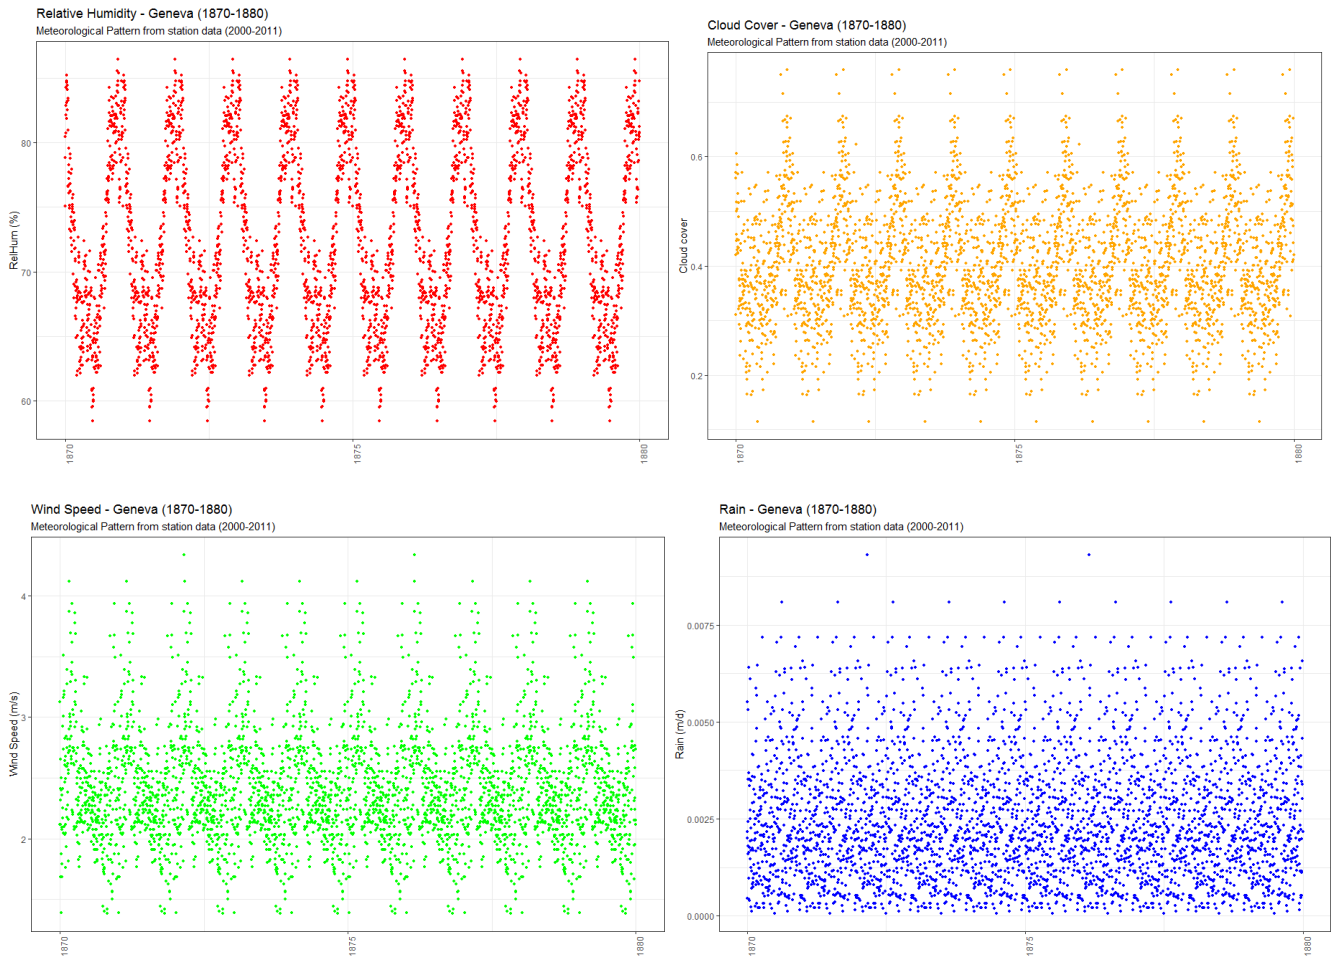

55 **Figure S4: Daily meteorological time series.** Relative humidity, Cloud cover, Wind speed and Rain estimated from the longest period with available data are represented here.

60

65

**Table S4: Model validation for 15 thermal metrics** over 10 years compared to long-term validation (37 to 63 years) for the four lakes (Annecy, Geneva, Bourget and Aiguebelette).

|        |                                        | 10 years      |          |          |        |        |                |        |          |        |        |      |
|--------|----------------------------------------|---------------|----------|----------|--------|--------|----------------|--------|----------|--------|--------|------|
|        |                                        | RMSE          |          |          |        |        | R <sup>2</sup> |        |          |        |        |      |
|        |                                        | GLM           | GOTM     | Simstrat | Flake  | MyLake | GLM            | GOTM   | Simstrat | Flake  | MyLake |      |
| Annecy | Full profile - water temp              | 2,3           | 3,5      | 3,5      | 3,07   | 1,56   | 0,77           | 0,27   | 0,83     | 0,51   | 0,86   |      |
|        | Epilimnion T°C                         | 5,2           | 6,9      | 5,1      | 4,94   | 2,02   | 0,77           | 0,63   | 0,86     | 0,59   | 0,9    |      |
|        | Hypolimnion T°C                        | 1,58          | 1,72     | 1,95     | 1,12   | 0,84   | 0,002          | 0,0001 | 0,01     | 0,07   | 0,1    |      |
|        | Metalimnion (m)                        | <i>Top</i>    | 6,94     | 8,96     | 8,1    | 15,09  | 11,6           | 0,29   | 0,28     | 0,01   | 0,13   | 0,29 |
|        |                                        | <i>Bottom</i> | 7,23     | 11,45    | 8,21   | 13,41  | 11,03          | 0,29   | 0,13     | 0,00   | 0,03   | 0,20 |
|        | Ts (5m) (°C)                           | 3,4           | 7,5      | 4,86     | 4,87   | 2,6    | 0,78           | 0,81   | 0,60     | 0,87   | 0,62   |      |
|        | Tb (299m) (°C)                         | 0,94          | 1,89     | 1,49     |        | 0,59   | 0,03           | 0,09   | 0,00     |        | 0,31   |      |
|        | Tm (°C)                                | 1,6           | 1,91     | 2,42     | 1,32   | 0,96   | 0,72           | 0,57   | 0,77     | 0,72   | 0,74   |      |
|        | Schmidt Stability (J/m <sup>2</sup> )  | 842,3         | 2025,1   | 1249,3   | 1304,8 | 820,9  | 0,79           | 0,61   | 0,78     | 0,59   | 0,86   |      |
|        | Thermocline depth (m)                  | 7,15          | 10,27    | 8,23     | 14,15  | 11,7   | 0,28           | 0,19   | 0,00     | 0,06   | 0,22   |      |
|        | Buoyancy frequency (s <sup>-2</sup> )  | 0,012         | 0,003    | 0,0018   | 0,0025 | 0,0018 | 0,21           | 0,05   | 0,21     | 0,01   | 0,21   |      |
|        | Stratif onset (day of year)            | 50            | 81       | 39       | 42,6   | 11,4   | 0,03           | 0,27   | 0,13     | 0,02   | 0,11   |      |
|        | Stratif break-up (day of year)         | 17,1          | 123,9    | 22,4     | 20,5   | 13,4   | 0,02           | 0,23   | 0,03     | 0,12   | 0,00   |      |
|        | Stratif duration (days)                | 68,9          | 162,5    | 61,3     | 26,4   | 19,1   | 0,00           | 0,63   | 0,26     | 0,79   | 0,00   |      |
|        | Day of stratif with intensity max      | 31,2          | 34,2     | 32,4     | 44,9   | 35,7   | 0,06           | 0,11   | 0,10     | 0,03   | 0,00   |      |
|        | Stratif intensity max (Tbottom - Ttop) | 4,73          | 11,29    | 2,58     | 5,53   | 2,62   | 0,80           | 0,61   | 0,82     | 0,66   | 0,80   |      |
|        |                                        |               | 54 years |          |        |        |                |        |          |        |        |      |
|        |                                        | RMSE          |          |          |        |        | R <sup>2</sup> |        |          |        |        |      |
|        |                                        | GLM           | GOTM     | Simstrat | Flake  | MyLake | GLM            | GOTM   | Simstrat | Flake  | MyLake |      |
|        | Full profile - water temp              | 2,53          | 3,4      | 2,96     | 3,04   | 1,84   | 0,65           | 0,24   | 0,69     | 0,45   | 0,75   |      |
|        | Epilimnion T°C                         | 6,17          | 6,58     | 5,45     | 4,7    | 3,69   | 0,57           | 0,51   | 0,67     | 0,5    | 0,67   |      |
|        | Hypolimnion T°C                        | 1,44          | 1,7      | 1,92     | 1,28   | 0,9    | 0,015          | 0,04   | 0,07     | 0,04   | 0,13   |      |
|        | Metalimnion (m)                        | <i>Top</i>    | 9,93     | 10,3     | 9,63   | 15,3   | 11,85          | 0,07   | 0,04     | 0,0001 | 0,08   | 0,14 |
|        |                                        | <i>Bottom</i> | 10       | 12,1     | 9,5    | 13,9   | 11,2           | 0,09   | 0,02     | 0,0003 | 0,016  | 0,1  |
|        | Ts (5m) (°C)                           | 4,28          | 6,89     | 5,27     | 4,66   | 3,35   | 0,62           | 0,51   | 0,68     | 0,53   | 0,69   |      |
|        | Tb (299m) (°C)                         | 0,9           | 1,92     | 1,45     |        | 0,79   | 0,00           | 0,09   | 0,00     |        | 0,14   |      |
|        | Tm (°C)                                | 1,7           | 2,18     | 2,48     | 1,66   | 1,17   | 0,53           | 0,46   | 0,55     | 0,59   | 0,57   |      |
|        | Schmidt Stability (J m <sup>-2</sup> ) | 6214,9        | 11190,4  | 7584,7   | 6553,2 | 5962,9 | 0,63           | 0,50   | 0,59     | 0,54   | 0,69   |      |
|        | Thermocline depth (m)                  | 9,94          | 11,03    | 9,6      | 14,6   | 11,8   | 0,08           | 0,03   | 0,00     | 0,05   | 0,11   |      |
|        | Buoyancy frequency (s <sup>-2</sup> )  | 0,01          | 0,003    | 0,001    | 0,002  | 0,001  | 0,24           | 0,03   | 0,18     | 0,00   | 0,14   |      |
|        | Stratif onset (day of year)            | 57,2          | 89,6     | 42,36    | 48,6   | 28     | 0,09           | 0,03   | 0,05     | 0,00   | 0,00   |      |

|                                        |       |       |      |      |      |      |      |      |      |      |
|----------------------------------------|-------|-------|------|------|------|------|------|------|------|------|
| Stratif break-up (day of year)         | 23,7  | 102,6 | 32,3 | 20,6 | 18,9 | 0,03 | 0,01 | 0,01 | 0,07 | 0,03 |
| Stratif duration (days)                | 77,36 | 172,1 | 72,1 | 31,4 | 27,8 | 0,00 | 0,05 | 0,02 | 0,01 | 0,06 |
| Day of stratif with intensity max      | 63    | 60,1  | 64,9 | 57,3 | 59,4 | 0,00 | 0,01 | 0,01 | 0,03 | 0,00 |
| Stratif intensity max (Tbottom - Ttop) | 7,6   | 11,3  | 5,35 | 6,51 | 5,49 | 0,03 | 0,04 | 0,08 | 0,01 | 0,03 |

|         |                                        | 10 years |          |          |         |         |                |      |          |       |        |      |
|---------|----------------------------------------|----------|----------|----------|---------|---------|----------------|------|----------|-------|--------|------|
|         |                                        | RMSE     |          |          |         |         | R <sup>2</sup> |      |          |       |        |      |
|         |                                        | GLM      | GOTM     | Simstrat | Flake   | MyLake  | GLM            | GOTM | Simstrat | Flake | MyLake |      |
| Bourget | Full profile - water temp              | 1,74     | 3,00     | 2,33     | 2,36    | 0,79    | 0,76           | 0,27 | 0,54     | 0,68  | 0,93   |      |
|         | Epilimnion T°C                         | 4,02     | 8,30     | 5,01     | 3,05    | 2,01    | 0,79           | 0,62 | 0,66     | 0,74  | 0,90   |      |
|         | Hypolimnion T°C                        | 1,30     | 0,97     | 1,92     | 1,86    | 0,51    | 0,10           | 0,00 | 0,30     | 0,12  | 0,15   |      |
|         | Metalimnion (m)                        | Top      | 11,38    | 11,50    | 21,40   | 19,60   | 8,31           | 0,63 | 0,38     | 0,05  | 0,19   | 0,69 |
|         |                                        | Bottom   | 11,17    | 12,19    | 21,20   | 19,20   | 6,70           | 0,64 | 0,45     | 0,06  | 0,15   | 0,70 |
|         | Ts (5m) (°C)                           | 2,98     | 3,99     | 4,86     | 3,34    | 1,81    | 0,88           | 0,63 | 0,77     | 0,77  | 0,93   |      |
|         | Tb (299m) (°C)                         | 0,98     | 1,08     | 1,30     |         | 0,45    | 0,27           | 0,04 | 0,40     |       | 0,55   |      |
|         | Tm (°C)                                | 0,98     | 1,78     | 1,38     | 1,31    | 0,40    | 0,55           | 0,38 | 0,54     | 0,77  | 0,76   |      |
|         | Schmidt Stability (J m <sup>-2</sup> ) | 5377,90  | 15650,50 | 7437,60  | 6715,60 | 3993,60 | 0,85           | 0,70 | 0,61     | 0,77  | 0,89   |      |
|         | Thermocline depth (m)                  | 11,13    | 11,96    | 21,25    | 19,41   | 7,92    | 0,64           | 0,43 | 0,05     | 0,16  | 0,69   |      |
|         | Buoyancy frequency (s <sup>-2</sup> )  | 0,01     | 0,00     | 0,00     | 0,00    | 0,00    | 0,18           | 0,00 | 0,00     | 0,16  | 0,13   |      |
|         | Stratif onset (day of year)            | 30,70    | 83,80    | 47,30    | 16,60   | 9,37    | 0,16           | 0,33 | 0,01     | 0,65  | 0,33   |      |
|         | Stratif break-up (day of year)         | 13,96    | 119,75   | 33,68    | 49,90   | 10,70   | 0,00           | 0,07 | 0,13     | 0,18  | 0,35   |      |
|         | Stratif duration (days)                | 19,28    | 159,60   | 69,27    | 57,49   | 13,09   | 0,89           | 0,28 | 0,00     | 0,02  | 0,12   |      |
|         | Day of stratif with intensity max      | 29,04    | 32,60    | 53,30    | 40,70   | 30,92   | 0,20           | 0,28 | 0,16     | 0,00  | 0,18   |      |
|         | Stratif intensity max (Tbottom - Ttop) | 2,09     | 13,90    | 7,40     | 4,70    | 2,12    | 0,91           | 0,86 | 0,93     | 0,65  | 0,95   |      |

|                 |                                        | 37 years |          |          |         |         |                |      |          |       |        |
|-----------------|----------------------------------------|----------|----------|----------|---------|---------|----------------|------|----------|-------|--------|
|                 |                                        | RMSE     |          |          |         |         | R <sup>2</sup> |      |          |       |        |
|                 |                                        | GLM      | GOTM     | Simstrat | Flake   | MyLake  | GLM            | GOTM | Simstrat | Flake | MyLake |
|                 | Full profile - water temp              | 1,67     | 3,18     | 3,41     | 3,91    | 1,02    | 0,76           | 0,23 | 0,26     | 0,36  | 0,88   |
|                 | Epilimnion T°C                         | 4,59     | 8,82     | 5,32     | 4,20    | 1,90    | 0,76           | 0,54 | 0,61     | 0,57  | 0,90   |
|                 | Hypolimnion T°C                        | 1,21     | 1,16     | 3016,00  | 2,97    | 0,80    | 0,00           | 0,01 | 0,00     | 0,02  | 0,01   |
| Metalimnion (m) | Top                                    | 12,70    | 11,82    | 22,99    | 30,95   | 11,60   | 0,45           | 0,16 | 0,02     | 0,34  | 0,39   |
|                 | Bottom                                 | 12,36    | 12,69    | 22,72    | 29,57   | 10,82   | 0,45           | 0,15 | 0,04     | 0,30  | 0,37   |
|                 | Ts (5m) (°C)                           | 3,20     | 9,30     | 4,93     | 3,35    | 1,90    | 0,86           | 0,58 | 0,72     | 0,63  | 0,92   |
|                 | Tb (299m) (°C)                         | 0,82     | 1,33     | 2,92     |         | 0,71    | 0,01           | 0,02 | 0,03     |       | 0,02   |
|                 | Tm (°C)                                | 0,95     | 2,12     | 2,66     | 2,97    | 0,73    | 0,64           | 0,38 | 0,11     | 0,50  | 0,49   |
|                 | Schmidt Stability (J m <sup>-2</sup> ) | 5507,30  | 15172,20 | 8172,90  | 8845,50 | 4191,60 | 0,53           | 0,58 | 0,51     | 0,57  | 0,88   |
|                 | Thermocline depth (m)                  | 12,44    | 12,30    | 22,80    | 30,12   | 11,47   | 0,45           | 0,15 | 0,03     | 0,32  | 0,37   |



|                                                  |       |        |       |       |       |      |      |      |      |      |
|--------------------------------------------------|-------|--------|-------|-------|-------|------|------|------|------|------|
| Buoyancy frequency ( $s^{-2}$ )                  | 0,01  | 0,00   | 0,00  | 0,00  | 0,00  | 0,18 | 0,00 | 0,00 | 0,01 | 0,20 |
| Stratif onset (day of year)                      | 42,38 | 101,50 | 57,91 | 45,79 | 16,71 | 0,10 | 0,01 | 0,04 | 0,21 | 0,17 |
| Stratif break-up (day of year)                   | 24,66 | 99,23  | 36,56 | 50,92 | 25,74 | 0,00 | 0,00 | 0,12 | 0,02 | 0,00 |
| Stratif duration (days)                          | 54,24 | 183,76 | 88,68 | 39,98 | 35,39 | 0,00 | 0,00 | 0,05 | 0,05 | 0,04 |
| Day of stratif with intensity max                | 24,80 | 28,38  | 32,12 | 46,80 | 27,60 | 0,02 | 0,02 | 0,01 | 0,01 | 0,01 |
| Stratif intensity max ( $T_{bottom} - T_{top}$ ) | 2,43  | 14,78  | 9,20  | 8,95  | 2,02  | 0,09 | 0,15 | 0,01 | 0,02 | 0,03 |

|              |                                                  | 10 years |       |          |        |         |      |        |          |       |        |
|--------------|--------------------------------------------------|----------|-------|----------|--------|---------|------|--------|----------|-------|--------|
|              |                                                  | RMSE     |       |          |        |         | R2   |        |          |       |        |
|              |                                                  | GLM      | GOTM  | Simstrat | Flake  | MyLake  | GLM  | GOTM   | Simstrat | Flake | MyLake |
| Aiguebelette | Full profile - water temp                        | 1,96     | 3,39  | 3,19     | 4,17   | 1,48    | 0,71 | 0,2    | 0,44     | 0,44  | 0,86   |
|              | Epilimnion T°C                                   | 6,2      | 9,26  | 9,36     | 4,8    | 2,61    | 0,71 | 0,6    | 0,78     | 0,7   | 0,89   |
|              | Hypolimnion T°C                                  | 0,41     | 1,93  | 1,1      | 2,12   | 1,31    | 0,2  | 0,11   | 0,04     | 0,05  | 0,14   |
|              | Metalimnion (m) Top                              | 9,66     | 7,85  | 10,35    | 12,9   | 8,72    | 0,27 | 0,2    | 0,005    | 0,42  | 0,65   |
|              | Bottom                                           | 9,2      | 8,43  | 9,12     | 12,34  | 8,43    | 0,26 | 0,08   | 0,07     | 0,24  | 0,49   |
|              | Ts (5m) (°C)                                     | 3,84     | 7,86  | 7,71     | 2,82   | 2,50    | 0,76 | 0,7    | 0,86     | 0,84  | 0,90   |
|              | Tb (299m) (°C)                                   | 0,39     | 1,73  | 0,7      |        | 0,49    | 0,14 | 0,0001 | 0,04     |       | 0,07   |
|              | Tm (°C)                                          | 0,63     | 1,89  | 1,87     | 2,51   | 0,95    | 0,67 | 0,51   | 0,7      | 0,81  | 0,72   |
|              | Schmidt Stability ( $J m^{-2}$ )                 | 2184,9   | 4448  | 4200,4   | 3113,2 | 1536,03 | 0,75 | 0,46   | 0,38     | 0,81  | 0,88   |
|              | Thermocline depth (m)                            | 9,47     | 7,9   | 9,74     | 12,51  | 8,80    | 0,26 | 0,13   | 0,03     | 0,28  | 0,56   |
|              | Buoyancy frequency ( $s^{-2}$ )                  | 0,009    | 0,005 | 0,0037   | 0,0038 | 0,00    | 0,34 | 0,03   | 0,22     | 0,02  | 0,21   |
|              | Stratif onset (day of year)                      | 62,4     | 96,3  | 74,6     | 30,06  | 20,32   | 0,53 | 0,002  | 0,14     | 0,32  | 0,44   |
|              | Stratif break-up (day of year)                   | 20,17    | 64,2  | 50,3     | 14,8   | 5,45    | 0,2  | 0,007  | 0,09     | 0,42  | 0,70   |
|              | Stratif duration (days)                          | 75,9     | 151,1 | 117,4    | 17,4   | 25,93   | 0,07 | 0,06   | 0,001    | 0,05  | 0,00   |
|              | Day of stratif with intensity max                | 30,5     | 27,6  | 29,1     | 34,25  | 40,62   | 0,15 | 0,04   | 0,07     | 0,59  | 0,11   |
|              | Stratif intensity max ( $T_{bottom} - T_{top}$ ) | 4,31     | 12,43 | 7,92     | 2,99   | 6,17    | 0,77 | 0,64   | 0,78     | 0,8   | 0,85   |

|  |                           | 46 years |      |          |       |        |        |      |          |       |        |
|--|---------------------------|----------|------|----------|-------|--------|--------|------|----------|-------|--------|
|  |                           | RMSE     |      |          |       |        | R2     |      |          |       |        |
|  |                           | GLM      | GOTM | Simstrat | Flake | MyLake | GLM    | GOTM | Simstrat | Flake | MyLake |
|  | Full profile - water temp | 2,21     | 3,51 | 3,41     | 4,29  | 1,85   | 0,61   | 0,14 | 0,3      | 0,34  | 0,74   |
|  | Epilimnion T°C            | 7,19     | 9,13 | 9,34     | 5,26  | 4,60   | 0,53   | 0,45 | 0,59     | 0,46  | 0,65   |
|  | Hypolimnion T°C           | 0,56     | 1,94 | 1,38     | 1,99  | 1,19   | 0,001  | 0,09 | 0,05     | 0,002 | 0,09   |
|  | Metalimnion (m) Top       | 9,85     | 8,11 | 10,12    | 13,6  | 9,46   | 0,11   | 0,03 | 0,007    | 0,26  | 0,30   |
|  | Bottom                    | 9,39     | 8,67 | 9,31     | 13,25 | 9,07   | 0,11   | 0,02 | 0,04     | 0,12  | 0,19   |
|  | Ts (5m) (°C)              | 4,74     | 8,01 | 8,09     | 3,92  | 3,53   | 0,58   | 0,51 | 0,65     | 0,51  | 0,65   |
|  | Tb (299m) (°C)            | 0,39     | 1,76 | 0,77     |       | 0,59   | 0,0008 | 0,02 | 0,009    |       | 0,06   |

|                                        |         |        |        |        |         |       |        |       |       |      |
|----------------------------------------|---------|--------|--------|--------|---------|-------|--------|-------|-------|------|
| Tm (°C)                                | 0,86    | 2,26   | 2,17   | 2,83   | 1,12    | 0,44  | 0,34   | 0,48  | 0,51  | 0,44 |
| Schmidt Stability (J m <sup>-2</sup> ) | 23612,4 | 4251,4 | 4043,4 | 3622,9 | 2398,21 | 0,59  | 0,38   | 0,29  | 0,53  | 0,66 |
| Thermocline depth (m)                  | 9,47    | 8,17   | 9,66   | 13,3   | 9,43    | 0,11  | 0,02   | 0,02  | 0,2   | 0,25 |
| Buoyancy frequency (s <sup>-2</sup> )  | 0,009   | 0,004  | 0,003  | 0,003  | 0,00    | 0,37  | 0,06   | 0,26  | 0,001 | 0,23 |
| Stratif onset (day of year)            | 73,6    | 103,4  | 84,8   | 37,1   | 15,83   | 0,016 | 0,0004 | 0,045 | 0,06  | 0,14 |
| Stratif break-up (day of year)         | 30,12   | 84,3   | 68,8   | 13,4   | 13,17   | 0,3   | 0,0002 | 0,008 | 0,22  | 0,18 |
| Stratif duration (days)                | 100,8   | 171,1  | 141,8  | 35,8   | 26,20   | 0,008 | 0,01   | 0,03  | 0,001 | 0,04 |
| Day of stratif with intensity max      | 23,6    | 24     | 25,2   | 27,16  | 28,61   | 0,004 | 0,01   | 0,09  | 0,11  | 0,14 |
| Stratif intensity max (Tbottom - Ttop) | 7       | 11,8   | 7,65   | 4,78   | 5,03    | 0,15  | 0,25   | 0,15  | 0,22  | 0,19 |

|        |                                        | 10 years      |         |          |        |        |                |          |          |          |        |      |
|--------|----------------------------------------|---------------|---------|----------|--------|--------|----------------|----------|----------|----------|--------|------|
|        |                                        | RMSE          |         |          |        |        | R <sup>2</sup> |          |          |          |        |      |
|        |                                        | GLM           | GOTM    | Simstrat | Flake  | MyLake | GLM            | GOTM     | Simstrat | Flake    | MyLake |      |
| Geneva | Full profile - water temp              | 1,05          | 2,26    | 1,06     | 2,009  | 0,79   | 0,76           | 0,51     | 0,77     | 0,45     | 0,87   |      |
|        | Epilimnion T°C                         | 2,74          | 6,89    | 2,78     | 3,73   | 1,92   | 0,81           | 0,75     | 0,79     | 0,66     | 0,91   |      |
|        | Hypolimnion T°C                        | 0,69          | 1,69    | 0,76     | 1,3    | 0,68   | 0,07           | 0,02     | 0,1      | 0,12     | 0,15   |      |
|        | Metalimnion (m)                        | <i>Top</i>    | 30,5    | 25,6     | 42,3   | 49,1   | 29,04          | 0,18     | 0,07     | 0,002    | 0,14   | 0,28 |
|        |                                        | <i>Bottom</i> | 30,4    | 25,9     | 42,4   | 48,8   | 27,9           | 0,17     | 0,06     | 1,00E-04 | 0,13   | 0,25 |
|        | Ts (5m) (°C)                           | 2,21          | 6,86    | 2,13     | 3,34   | 1,41   | 0,86           | 0,8      | 0,87     | 0,74     | 0,93   |      |
|        | Tb (299m) (°C)                         | 0,78          | 1,46    | 0,71     |        | 0,76   | 0,06           | 0,03     | 0,06     |          | 0,08   |      |
|        | Tm (°C)                                | 0,52          | 1,86    | 0,5      | 0,85   | 0,56   | 0,4            | 0,11     | 0,37     | 0,44     | 0,42   |      |
|        | Schmidt Stability (J m <sup>-2</sup> ) | 6064,9        | 12418,2 | 6014,3   | 6484,6 | 3108,4 | 0,88           | 0,74     | 0,83     | 0,71     | 0,89   |      |
|        | Thermocline depth (m)                  | 30,4          | 25,8    | 42,3     | 49     | 28     | 0,18           | 0,06     | 0,0008   | 0,13     | 0,27   |      |
|        | Buoyancy frequency (s <sup>-2</sup> )  | 0,006         | 0,002   | 0,001    | 0,0015 | 0,001  | 0,005          | 6,16E-06 | 0,09     | 0,12     | 0,28   |      |
|        | Stratif onset (day of year)            | 39,9          | 80,01   | 54,7     | 25     | 32,5   | 0,003          | 0,07     | 0,03     |          | 0,33   |      |
|        | Stratif break-up (day of year)         | 8,7           | 52,7    | 4,3      |        | 17,04  | 0,13           | 0,028    | 0,44     |          | 0,0002 |      |
|        | Stratif duration (days)                | 48,05         | 136,1   | 51,9     |        | 41,9   | 0,56           | 0,06     | 0,03     |          | 0,0002 |      |
|        | Day of stratif with intensity max      | 20,3          | 17,2    | 29,8     | 25,03  | 15,2   | 0,0003         | 0,41     | 0,42     | 0,11     | 0,46   |      |
|        | Stratif intensity max (Tbottom - Ttop) | 3,02          | 9,8     | 1,9      | 5,4    | 1,15   | 0,88           | 0,91     | 0,85     | 0,68     | 0,94   |      |

|                 |                           | 63 years |      |          |       |        |                |      |          |       |        |
|-----------------|---------------------------|----------|------|----------|-------|--------|----------------|------|----------|-------|--------|
|                 |                           | RMSE     |      |          |       |        | R <sup>2</sup> |      |          |       |        |
|                 |                           | GLM      | GOTM | Simstrat | Flake | MyLake | GLM            | GOTM | Simstrat | Flake | MyLake |
|                 | Full profile - water temp | 1,02     | 2,25 | 1,002    | 2,25  | 0,67   | 0,78           | 0,53 | 0,81     | 0,47  | 0,89   |
|                 | Epilimnion T°C            | 3,08     | 7,48 | 3,12     | 3,75  | 2,08   | 0,76           | 0,62 | 0,74     | 0,65  | 0,87   |
|                 | Hypolimnion T°C           | 0,57     | 1,7  | 0,78     | 1,75  | 0,57   | 0,10           | 0,13 | 0,15     | 0,3   | 0,18   |
| Metalimnion (m) | <i>Top</i>                | 27,6     | 26,9 | 27,2     | 49,4  | 21,3   | 0,08           | 0,02 | 0,05     | 0,15  | 0,23   |
|                 | <i>Bottom</i>             | 27,4     | 27,2 | 27,24    | 49,1  | 23,04  | 0,07           | 0,01 | 0,04     | 0,13  | 0,21   |

|                                                                        |        |         |        |        |         |       |       |       |          |        |
|------------------------------------------------------------------------|--------|---------|--------|--------|---------|-------|-------|-------|----------|--------|
| Ts (5m) (°C)                                                           | 2,22   | 7,19    | 2,25   | 3,28   | 1,51    | 0,86  | 0,72  | 0,85  | 0,73     | 0,92   |
| Tb (299m) (°C)                                                         | 0,71   | 1,24    | 0,46   |        | 0,45    | 0,02  | 0,008 | 0,17  |          | 0,19   |
| Tm (°C)                                                                | 0,55   | 1,79    | 0,5    | 1,59   | 0,44    | 0,48  | 0,34  | 0,57  | 0,45     | 0,49   |
| Schmidt Stability ( $J m^{-2}$ )                                       | 5835,4 | 12947,5 | 2084,5 | 7405,5 | 3433,1  | 0,86  | 0,53  | 0,82  | 0,59     | 0,87   |
| Thermocline depth (m)                                                  | 27,7   | 27,01   | 27,2   | 49,3   | 21,2    | 0,08  | 0,017 | 0,05  | 0,14     | 0,22   |
| Buoyancy frequency ( $s^{-2}$ )                                        | 0,0059 | 0,0015  | 0,0013 | 0,0012 | 0,00086 | 0,02  | 0,003 | 0,057 | 0,08     | 0,31   |
| Stratification onset (day of year)                                     | 29,7   | 80,2    | 45,7   | 32,8   | 20,9    | 0,06  | 0,05  | 0,016 | 0,02     | 0,0006 |
| Stratification break-up (day of year)                                  | 30,1   | 79,4    | 24,8   | 41,1   | 23,7    | 0,07  | 0,01  | 0,1   | 0,01     | 0,1    |
| Stratification duration (days)                                         | 54,9   | 148,5   | 57,7   | 57,3   | 35,4    | 0,07  | 0,004 | 0,05  | 0,05     | 0,14   |
| Day of stratification with intensity max                               | 22,6   | 27,03   | 31,5   | 36,2   | 25,3    | 0,01  | 0,002 | 0,008 | 3,00E-03 | 0,006  |
| Stratification intensity max (T <sub>bottom</sub> - T <sub>top</sub> ) | 3,12   | 10,4    | 2,19   | 6,6    | 1,7     | 0,009 | 0,02  | 0,016 | 0,03     | 0,001  |

75

**Table S5: Models performance comparison** over 10-years calibration and validation periods (depending on each lakes data availability) for Lakes Geneva, Annecy, Bourget and Aiguebelette.

| Lake   | Measure | Period | GLM   | GOTM  | Simstrat | Flake | MyLake |
|--------|---------|--------|-------|-------|----------|-------|--------|
| Geneva | RMSE    | cal    | 1,74  | 3,99  | 1,86     | 3,09  | 1,14   |
|        |         | val    | 1,94  | 4,24  | 1,91     | 3,13  | 1,11   |
|        | r       | cal    | 0,91  | 0,81  | 0,89     | 0,79  | 0,96   |
|        |         | val    | 0,91  | 0,85  | 0,90     | 0,73  | 0,97   |
|        | NSE     | cal    | 0,82  | -0,01 | 0,78     | 0,55  | 0,92   |
|        |         | val    | 0,79  | -0,08 | 0,78     | 0,52  | 0,93   |
|        | MAE     | cal    | 1,13  | 2,65  | 1,18     | 2,37  | 0,73   |
|        |         | val    | 1,16  | 3,11  | 1,15     | 2,33  | 0,75   |
| Bias   | cal     | 0,41   | -2,65 | 0,36  | 0,22     | 0,30  |        |
|        | val     | 0,22   | -3,11 | -0,12 | 0,24     | -0,24 |        |
| Annecy | RMSE    | cal    | 2,72  | 4,26  | 3,14     | 3,25  | 1,72   |
|        |         | val    | 3,13  | 4,57  | 3,62     | 3,66  | 1,95   |
|        | r       | cal    | 0,85  | 0,56  | 0,91     | 0,76  | 0,94   |
|        |         | val    | 0,86  | 0,59  | 0,9      | 0,71  | 0,94   |
|        | NSE     | cal    | 0,61  | 0,01  | 0,46     | 0,53  | 0,84   |
|        |         | val    | 0,55  | -0,03 | 0,4      | 0,46  | 0,82   |
|        | MAE     | cal    | 1,64  | 3,04  | 2,49     | 2,15  | 1,17   |
|        |         | val    | 2,14  | 3,27  | 2,94     | 2,42  | 1,27   |

|         |              |      |       |       |       |       |       |      |
|---------|--------------|------|-------|-------|-------|-------|-------|------|
|         | Bias         | cal  | -1,37 | -2,35 | -2,47 | -1,00 | -0,91 |      |
|         |              | val  | -1,94 | -2,59 | -2,92 | -1,08 | -0,99 |      |
| Bourget | RMSE         | cal  | 2,07  | 3,90  | 2,78  | 3,32  | 1,02  |      |
|         |              | val  | 2,34  | 4,61  | 3,03  | 2,82  | 1,11  |      |
|         | r            | cal  | 0,87  | 0,54  | 0,81  | 0,66  | 0,96  |      |
|         |              | val  | 0,89  | 0,62  | 0,75  | 0,84  | 0,97  |      |
|         | NSE          | cal  | 0,70  | -0,08 | 0,61  | 0,22  | 0,93  |      |
|         |              | val  | 0,74  | -0,03 | 0,56  | 0,68  | 0,94  |      |
|         | MAE          | cal  | 1,20  | 2,31  | 1,97  | 2,86  | 0,62  |      |
|         |              | val  | 1,39  | 2,78  | 2,26  | 2,03  | 0,67  |      |
|         | Bias         | cal  | -0,43 | -2,18 | 0,99  | 1,76  | -0,05 |      |
|         |              | val  | -0,83 | -2,59 | 0,38  | 0,74  | -0,03 |      |
|         | Aiguebelette | RMSE | cal   | 2,65  | 4,82  | 4,49  | 5,25  | 1,59 |
|         |              |      | val   | 2,05  | 3,70  | 3,29  | 4,78  | 1,59 |
| r       |              | cal  | 0,86  | 0,48  | 0,72  | 0,56  | 0,95  |      |
|         |              | val  | 0,86  | 0,43  | 0,72  | 0,62  | 0,93  |      |
| NSE     |              | cal  | 0,71  | 0,04  | 0,17  | 0,19  | 0,90  |      |
|         |              | val  | 0,73  | 0,11  | 0,29  | 0,15  | 0,84  |      |
| MAE     |              | cal  | 1,30  | 3,10  | 2,69  | 4,01  | 1,14  |      |
|         |              | val  | 0,92  | 2,46  | 1,71  | 3,38  | 1,09  |      |
| Bias    |              | cal  | -0,61 | -2,16 | -2,68 | 1,43  | 0,31  |      |
|         |              | val  | -0,05 | -0,86 | -1,66 | 1,86  | 0,69  |      |
